1 Title: Synchrony of Bird Migration with Avian Influenza Global Spread;  
2 Implications for Vulnerable Bird Orders

3 Authors: Qiqi Yang<sup>1†</sup>, Ben Wang<sup>2</sup>, Phillipe Lemey<sup>3</sup>, Lu Dong<sup>4</sup>, Tong Mu<sup>5</sup>,  
4 R. Alex Wiebe<sup>1</sup>, Fengyi Guo<sup>1</sup>, Nidia Sequeira Trovão<sup>6</sup>, Sang Woo Park<sup>1</sup>,  
5 Nicola Lewis<sup>7,8</sup>, Joseph Tsui<sup>9</sup>, Sumali Bajaj<sup>9</sup>, Yachang Cheng<sup>10</sup>, Luojun  
6 Yang<sup>11</sup>, Yuki Haba<sup>1</sup>, Bingying Li<sup>2</sup>, Guogang Zhang<sup>12\*</sup>, Oliver G. Pybus<sup>8,9\*</sup>,  
7 Huaiyu Tian<sup>2\*†</sup>, Bryan Grenfell<sup>1,5\*†</sup>

8 Affiliations:

- 9 1. Department of Ecology and Evolutionary Biology, Princeton, NJ, USA.
- 10 2. State Key Laboratory of Remote Sensing Science, Center for Global  
11 Change and Public Health, College of Global Change and Earth System Sci-  
12 ence, Beijing Normal University, Beijing, China.
- 13 3. Department of Microbiology, Immunology and Transplantation, Rega In-  
14 stitute, KU Leuven, Leuven, Belgium.
- 15 4. College of Life Sciences, Beijing Normal University, Beijing, China.
- 16 5. Princeton School of Public and International Affairs, Princeton, NJ, USA.
- 17 6. Fogarty International Center, U.S. National Institutes of Health, 16 Center  
18 Drive, Bethesda, MD 20892, USA.
- 19 7. Animal and Plant Health Agency-Weybridge, OIE/FAO International Ref-  
20 erence Laboratory for Avian Influenza, Swine Influenza and Newcastle Disease  
21 Virus, Department of Virology, Woodham Lane, Addlestone, Surrey KT15  
22 3NB, United Kingdom.
- 23 8. Department of Pathobiology and Population Science, Royal Veterinary  
24 College, London, UK.
- 25 9. Department of Biology, University of Oxford, Oxford, United Kingdom.
- 26 10. State Key Laboratory of Biocontrol, School of Ecology, Shenzhen Campus  
27 of Sun Yat-sen University, Shenzhen, 518107 Guangdong, China.
- 28 11. Institute for Disease Modeling, Bill Melinda Gates Foundation, Seattle,  
29 WA, USA.
- 30 12. Key Laboratory of Forest Protection of National Forestry and Grass-  
31 land Administration, Ecology and Nature Conservation Institute, Chinese  
32 Academy of Forestry, National Bird Banding Center of China, Beijing, China.

---

†Correspondence: [qiqiy@princeton.edu](mailto:qiqiy@princeton.edu), [tianhuaiyu@gmail.com](mailto:tianhuaiyu@gmail.com), [grenfell@princeton.edu](mailto:grenfell@princeton.edu)

\*Contributed equally as senior authors

33

## Abstract

34

35

36

37

38

39

40

41

42

43

44

45

46

47

48

49

50

51

52

Highly pathogenic avian influenza virus (HPAIV) A H5 clade 2.3.4.4 has caused worldwide outbreaks in domestic poultry, occasional spillover to humans, and increasing deaths of diverse species of wild birds since 2014. Wild bird migration is currently acknowledged as an important ecological process contributing to the global dispersal of HPAIV H5. However, it is unclear *how seasonal bird migration facilitates global virus dispersal, and which avian species are exposed to HPAI H5 clade 2.3.4.4 viruses and where*. To shed light on ongoing global outbreaks, we sought to explore these questions through phylodynamic analyses based on empirical data of bird movement tracking and virus genome sequences. First, based on viral phylogeography and bird migration networks, we demonstrate that seasonal bird migration can explain salient features of the global dispersal of clade 2.3.4.4. Second, we detect synchrony between the seasonality of bird annual cycle phases and virus lineage movements. We reveal the differing vulnerable bird orders at geographical origins and destinations of HPAIV H5 lineage movements. Notably, we highlight the potential importance of relatively under-discussed Suliformes and Ciconiiformes, in addition to Anseriformes and Charadriiformes, in virus lineage movements. Our study provides a phylodynamic framework that links the bird movement ecology and genomic epidemiology of avian influenza; it highlights the importance of integrating bird behaviour and life history in avian influenza studies.

## 53 1 Introduction

54 The re-emergence of highly pathogenic avian influenza viruses (HPAIVs) subtype H5  
55 clade 2.3.4.4 since 2014 [1] has caused unprecedentedly large numbers of wild bird deaths  
56 worldwide [2]. In contrast to previous clades of the A/goose/Guangdong/1996 (Gs/GD)  
57 lineage, there have also been more persistent spillovers to local domestic poultry [3–7], im-  
58 pacting the poultry farming industry. Despite no onward human-to-human transmission  
59 to date, occurrences of zoonotic jumps to humans pose potential threats to public health  
60 [8–12]. The unique epidemiological pattern of clade 2.3.4.4 HPAIV H5 is potentially  
61 shaped by eco-evolutionary processes: i) the continued selection for both higher trans-  
62 missibility and virulence, e.g., as observed in ducks [13, 14]; ii) the interaction between  
63 the viruses and a wider range of hosts [15].

64 To shed light on the underlying eco-evolutionary processes, it is critical to understand  
65 the spatial dynamics of clade 2.3.4.4 and the ecological factors that influence these pat-  
66 terns. Plausible ecological mechanisms for the global movement of HPAIVs include the  
67 live poultry trade and wild bird migration [16, 17]. Preceding the recent re-emergence  
68 of clade 2.3.4.4, there has been a long-term debate about whether wild bird migration  
69 drives HPAIV dispersal [18, 19]. However, the re-emergence of clade 2.3.4.4 continues  
70 to provide virological, epidemiological, and ecological evidence in support of the critical  
71 role of migratory wild birds in HPAIV spread and evolution at a global scale. Com-  
72 pared to previous clades, clade 2.3.4.4a during 2014/15 outbreaks was less pathogenic to  
73 some species while being more effectively transmitted [20–22], possibly enabling infected  
74 birds to migrate between continents. Subsequent phylodynamic work confirmed that the  
75 introduction of clade 2.3.4.4a into Europe and North America was most likely via long-  
76 distance flights of infected migratory birds [23]. During the 2016/17 outbreaks, the major  
77 circulating clade 2.3.4.4b was more transmissible [24] and more virulent [14], related to  
78 multiple internal genes [14, 24] and potentially their frequent reassortments [4–6]. Later  
79 phylogenetic analysis showed a clear link between the reassortments and migratory birds,  
80 as most reassorted gene segments were from migratory wild birds and originated at dates  
81 and locations that corresponded to their hosts’ migratory cycles [25]. Integrating host  
82 movement in studying HPAIV dispersal is important while challenging. One challenge  
83 is insufficient bird movement data, which causes that previous global-scale studies [23]  
84 cannot account for the high variation in bird behaviours across species and locations.

85 Another challenge of studying HPAIV dispersal in wild birds is the lack of HPAIV  
86 prevalence data. Only a few studies document longitudinal HPAIV prevalence in wild bird  
87 populations [26]. Compared to HPAIV, low pathogenic AIV (LPAIV) has better long-term  
88 surveillance of infections or seroprevalence and related avian host ecology in disparate

89 bird habitats, e.g., the United States Geological Survey (USGS) surveillance of birds in  
90 Alaska [27]. While longitudinal records provide insights into the role of life history and  
91 ecology of local bird communities in LPAIV circulation[28], their conclusions are limited  
92 to local dynamics and cannot be easily generalized. To resolve this challenge, ideally, we  
93 should have systematic global surveillance for HPAIV. However, this is impossible due to  
94 resource constraints.

95 Instead, we could design effective surveillance strategies by identifying vulnerable  
96 avian species and high-risk geographical regions. Recently, researchers have addressed  
97 these questions at a higher taxonomic level to include more diverse species. For example,  
98 Hill et al. compared the different roles of species within the Anseriformes and Charadri-  
99 iformes in the dispersal and spillover of AIVs [29]. They concluded that wild geese and  
100 swans are the main source species of HPAIV H5, while gulls spread the viruses most  
101 rapidly. Hicks et al. found that the inter-species transmission of AIVs in North Amer-  
102 ica is positively associated with the overlap of habitats, suggesting the importance of  
103 local bird community diversity [30]. However, they did not use empirical bird movement  
104 data. Furthermore, given the heterogeneous biogeographical pattern of bird migrations,  
105 identifying geographical hotspots requires linking global and local scales.

106 To fill this gap, we here focus on two questions related to the contributions of birds,  
107 locally and globally, to the spatiotemporal dynamics of HPAIV H5 viruses; specifically,  
108 i) how does seasonal bird migration facilitate global virus dispersal and ii) which avian  
109 species are exposed to HPAIV H5 and where? To explore these questions, we first il-  
110 lustrate the global circulation history of clade 2.3.4.4 using time-scaled phylogeographic  
111 analyses of hemagglutinin (HA) genes of HPAIVs sampled from wild birds and poultry  
112 between 2007 and 2018. ~~Building upon previous evidence, we propose possible routes of~~  
113 ~~long-distance virus dispersal.~~ There are two caveats: first, while we only included HA,  
114 internal genes also contribute to virus evolution, e.g., via reassortment [25]; second, the  
115 geographical bias of virus sampling has a strong impact on the virus lineage movement  
116 routes, especially for locations under-sampled. Based on ~~the estimated routes and~~ in-  
117 ferred virus dispersal history, we quantify the contribution of seasonal bird migrations to  
118 global virus dispersal and evolution. Second, we model the monthly geographical distri-  
119 bution of bird orders using species distribution models based on environmental factors  
120 and bird tracking data. We evaluate the risks of bird orders being exposed to HPAIV  
121 H5 at geographical origins and destinations of virus lineage movement by analyzing the  
122 statistical association of local bird distributions and virus lineage migration. Our study  
123 provides an approach that integrates bird migration ecology in HPAIV epidemiological  
124 studies to disentangle the mechanisms of interaction between HPAIV and wild birds.

## 125 2 Results

### 126 2.1 Seasonal bird migration associates with global HPAIV H5 127 dispersal

128 *Is the wide geographical range of HPAIV H5 clade 2.3.4.4 caused by frequent introductions*  
129 *from one region to another, or a single introduction resulting in subsequent spread within*  
130 *the area?* The discrete-trait phylogeographical analysis of HA genes exhibits scarce virus  
131 lineage movements between aggregated regions, most of which are unidirectional (Figure  
132 1A). It suggests that inter-regional viral introductions over long geographical distance oc-  
133 cur at low frequency and in one direction. Furthermore, the sequences are highly clustered  
134 by region, implying viral persistence within each region after introduction. These pat-  
135 terns qualitatively match bird migration patterns: migratory birds can fly long distances  
136 during their migrations, and only fly in one direction in a given season. After arriving  
137 at stopover, breeding, or wintering sites, they usually stay for some time, allowing viral  
138 transmission to other species or the environment.

139 To test quantitatively whether seasonal bird migration is a key predictor of HPAIV H5  
140 dispersal, we fit a generalized linear model (GLM) parameterization of the discrete phylo-  
141 geography using a Bayesian model selection procedure [31, 32]. Concurrently, we consider  
142 seasonal bird migration, live poultry trade and poultry population size as covariates of  
143 the diffusion rates between regions. To incorporate the potential seasonal difference in  
144 viral dispersal, we model a time-heterogeneous phylogenetic history [33] with three sea-  
145 sons based on bird annual cycle in North Hemisphere: non-migration (mid-November to  
146 mid-February, mid-May to mid-September), spring migration (mid-February to mid-May)  
147 and fall migration (mid-September to mid-November). Figure 1B shows the posterior es-  
148 timates of the inclusion probabilities and conditional effect sizes (on a log scale) of the  
149 covariates. It reveals that seasonal bird migration is the dominant driver of the global  
150 virus lineage movements of HPAIV H5. This is shown in both the log conditional effect  
151 size of the seasonal bird migration (mean:  $\sim 1.96$ ; 95% highest probability density inter-  
152 val, HPDI: 0.88-4.56) and the statistical support for its inclusion (posterior probability  
153  $> 0.999$  and Bayes factor  $> 16565$ ).

154 In contrast, poultry population size and the live poultry trade are not associated with  
155 the inter-region dispersal of HPAIV H5 (Figure 1B) in this analysis. It is also evident in  
156 both the effect size and the statistical support, e.g, the log conditional effect size of live  
157 poultry trade (mean:  $\sim 0.44$ , HPDI: 0.12-0.84) and the statistical support for its inclusion  
158 (posterior probability:  $\sim 0.31$  and Bayes factor: 5). To maintain genetic diversity in our  
159 data set, we did not down-sample the sequences, which leaves considerable heterogeneity

160 in sample sizes among locations. Therefore, we included the sample size as a predictor  
161 in the model to raise the credibility that the inclusion of other predictors is not due to  
162 sampling bias. Based on these results, we used subsequent analyses to understand the  
163 importance of different bird species at order taxonomy level in the global dispersal and  
164 local emergence of HPAIV H5 clade 2.3.4.4.

## 165 **2.2 Vulnerable migratory bird orders at origin and destination** 166 **regions of HPAIV H5 virus lineage movement**

167 We identified 20 virus dispersal routes (Bayes factor  $>3$ ) between the aggregated regions  
168 in the Northern Hemisphere (Figure 2A) using the previous phylogeography analyses.  
169 Seasonality is reflected in northward and southward virus lineage movements. Further-  
170 more, it overlaps well with the bird migration seasonality. Most virus lineage movements  
171 (14 of 20) show a single temporal peak (Figure S5, 2A). The peaks of the northward  
172 routes overlap with spring bird migration and/or wintering period (upper rows of Fig-  
173 ure 2A, Figure S5.1). Only one route (Japan-Korea to USA-Canada) overlaps with the  
174 summer breeding period. Most southward virus lineage movements peak during the Fall  
175 bird migration period, although some peaks continue in November when birds might still  
176 be migrating along some routes (lower half of Figure 2A, Figure S5.2). Only one route  
177 (Europe to Qinghai) overlaps with the wintering period. In summary, in the North-  
178 ern Hemisphere, virus lineage movements from south to north occur mainly during the  
179 wintering period and spring bird migration, while southward virus lineage movements  
180 occur mainly during the fall migration period when birds fly to the south. This as-  
181 sociation of seasonality in bird migration and HPAIV H5 lineage movement suggests  
182 that bird migration is a mechanism of HPAIV H5 global dispersal. It also implies that  
183 breeding grounds are potential genetic pools of HPAIV H5 diversity for southward virus  
184 lineage movements associated with bird migration; wintering grounds play a similar role  
185 for the northward viral lineage movements. Additionally, the results show more virus  
186 lineage movements during the fall migration (Southward Markov Jump counts: 310498  
187 per month, September-November) than the spring migration (Northward Markov Jump  
188 counts: 257503 per month, March-May). Virus lineage movements also have higher  
189 relative frequency during the fall migration (shown in the higher peak in Figure 2). In-  
190 terestingly, birds also migrate in a larger abundance in the fall than during spring, as the  
191 population size becomes larger after breeding.

192 *Which migratory bird orders might be exposed to HPAIV H5 at the origin or desti-*  
193 *nation regions of virus lineage movements?* To explore this question, we examined the  
194 synchrony of bird order distribution and virus lineage movements. The result shows that

195 8 bird orders (out of 9) at origin or destination regions are correlated with 12 virus lin-  
196 eage movement routes (out of 20) (Table S4, Figure 2A). Notably, the distribution of  
197 Suliformes, e.g., cormorants, during a year in Europe ( $r = 0.996$ , 95% confidence inter-  
198 vals, CI: [-0.566, 0.566],  $p < 0.001$ ) and Qinghai ( $r = 0.899$ , CI: [-0.566, 0.566],  $p < 0.002$ )  
199 synchronizes with virus lineage movements from Europe to Qinghai, suggesting that Suli-  
200 formes might be associated with HPAIV H5 spread from Europe to Qinghai. However,  
201 due to the possible under-sampling of viruses in northern and central Eurasia, we can-  
202 not conclude that virus lineage movements occur directly from Europe to Qinghai. In  
203 addition, Suliformes, along with Charadriiformes, Ciconiiformes, and Anseriformes, are  
204 associated with multiple ( $>2$ ) virus lineage movements. Three routes of virus lineage  
205 movement are related to the distribution of multiple ( $>2$ ) bird orders:

- 206 • The virus lineage movement from Qinghai to Europe is associated with the Charadri-  
207 iformes distribution in Qinghai ( $r = -0.820$ ,  $p < 0.005$ ), and the distribution of  
208 Suliformes ( $r = 0.924$ ,  $p < 0.001$ ) and Passeriformes ( $r = 0.878$ ,  $p < 0.002$ ) in  
209 Europe.
- 210 • The virus lineage movement from South China to South East Asia synchronizes with  
211 the Charadriiformes distribution in South China ( $r = 0.803$ ,  $p < 0.005$ ), and the  
212 distribution of Suliformes ( $r = 0.912$ ,  $p < 0.002$ ) and Falconiformes ( $r = 0.890$ ,  $p <$   
213  $0.002$ ) in South East Asia.
- 214 • The virus lineage movement from Europe to Africa is related to the Ciconiiformes  
215 distribution in Europe ( $r = 0.813$ ,  $p < 0.005$ ), and the distribution of Charadri-  
216 iformes ( $r = 0.886$ ,  $p < 0.002$ ) and Anseriformes in Africa ( $r = 0.905$ ,  $p < 0.002$ ).

217 Despite the possible geographical sampling bias, our results suggest integrating host dis-  
218 tribution inference and phylogeographic analysis might be able to retrospectively identify  
219 important bird species and geographical regions in avian influenza transmission.

### 220 3 Discussion

221 Here, we report a phylodynamic analysis linking spatial ecology of avian hosts and HPAIV  
222 H5 virus lineage movements. Our results support previous findings on the important  
223 role of bird migration in the dissemination of HPAIV H5 clade 2.3.4.4 [23]. We found  
224 that the seasonal wild bird migration network is associated with the global diffusion  
225 and evolutionary dynamics of HPAIV H5. A previous study found that the 2014/2015  
226 outbreaks of HPAIV H5 in Europe and North America were likely introduced by wild  
227 bird migration [23] by comparing the inferred ancestral host-type and location traits of

228 the viral genome sequences [23]. Our study advances this finding by directly integrating  
229 the bird migration trajectory network into the virus phylogeographic reconstruction. In  
230 addition, we found that inter-regional live poultry trade is not associated with the global  
231 HPAIV H5 dispersal, consistent with previous studies [16, 23]. The same previous study  
232 found that the international poultry trade's direction is opposite to the global spread  
233 direction of HPAIV H5 clade 2.3.4.4 [23]. Another previous study demonstrated large-  
234 scale H5N1 transmission dynamics are structured according to different bird flyways and  
235 driven by the Anatidae family, while the Phasianidae family, largely representing poultry,  
236 is an evolutionary sink [16].

237 Historically, Anseriformes have been the focus of wild bird hosts when studying host-  
238 pathogen interaction in AIV studies. However, many other understudied orders have  
239 been affected by clade 2.3.4.4 recently [15, 34]. Interaction of different avian orders  
240 might contribute to virus dispersal and local persistence [29]. A previous study showed  
241 that host origins of HPAIV H5 reassorted genes include Anseriformes, other groups of  
242 wild birds, and domestic poultry [25].

243 *Caveats.* A limitation of our results is that the undersampling of viruses in some  
244 areas hugely impacted the inferred phylogeography. For example, we cannot conclude  
245 if the inferred viral lineage movement from Europe to Qinghai or Japan-Korea occurs  
246 directly or if geographically-proximate areas, e.g., central Eurasia, are middle stops of  
247 the movement, due to under-sampling in central Eurasia. Despite including sampling  
248 size in the phylogeographical analysis, we cannot adjust the geographical sampling biases  
249 due to the unknown magnitude of infections at locations. Fortunately, the sampling  
250 efforts in some historically under-sampled and no-sampled areas are growing, e.g., in  
251 Australia [35]. In the future, given more extensive and evenly-sampled spatial data, our  
252 methods could be utilized to understand the role of wild birds in virus dispersal.

253 Despite using empirical bird movement data, our analyses include limited species  
254 diversity and dispersal area. Therefore, we did not include the migration volume of  
255 birds in the migration network (Figure 1). Currently, bird migration is summarized as a  
256 binary network. In the future, integrating comprehensive bird movement models [36, 37]  
257 would provide a more detailed understanding of the mechanism of how bird migration  
258 contributes to AIV dispersal. Another caveat is that we only considered the HA gene  
259 when inferring AIV diffusion and evolution. HA is a key gene in influenza viruses, as  
260 it is the receptor-binding and membrane fusion glycoprotein of influenza virus and the  
261 target for infectivity-neutralizing antibodies [38]. However, the reassortment events of all  
262 internal genes are also important in the dispersal and evolution of HPAIV H5 [25].

263 Our results also show high spatial and temporal heterogeneity in the association  
264 strength between specific bird orders and virus lineage movements. Despite the low



265 relative frequency of virus lineage movements during summer breeding and wintering,  
266 they may serve as a gene pool for following virus lineage movement during the migration.  
267 A previous study emphasizes the important role of the breeding period in interspecies  
268 virus transmission in North America [30]. Previous surveillance also shows that LPAI  
269 prevalence in waterfowls is higher during the wintering period of Eurasian migratory  
270 birds in Africa [39]. Additionally, our results highlight the importance of Suliformes and  
271 Ciconiiformes in HPAIV H5 dispersal, which are understudied compared to Anseriformes  
272 and Charadriiformes.

273 We did not account for possible interspecies transmission among individuals of mul-  
274 tiple bird orders. This is a possible reason for associations between some bird orders  
275 and virus dispersal routes where there is no direct bird migration between the origin and  
276 destination location. For example, the spring migration of Suliformes and Falconiformes  
277 overlaps with virus lineage movements from Japan-Korea to Europe. While birds might  
278 not directly fly between the two regions, various species stop between Japan and Europe  
279 during migration. Interspecies transmission at the stop-over sites might lead to the virus  
280 lineage movements (Figure 2D). However, the under-sampling of the viruses and lack of  
281 bird tracking data might also contribute to the observed pattern.

282 Another limitation is that we did not account for variation in movement behaviour  
283 within each bird order. Due to limited data, bird order is the most accurate taxonomy  
284 level we can study reliably. Finally, we included virus samples from domestic poultry  
285 when inferring virus diffusion. Therefore, some patterns in the results could reflect virus  
286 transmission between domestic poultry and spillover from wild birds to poultry rather  
287 than bird migratory patterns.

288 In conclusion, allocating more resources for global surveillance of avian influenza  
289 viruses in wild birds would enhance our ability to tackle the challenges of more viru-  
290 lent and transmissible HPAIV H5 spreading in wild birds. To achieve this goal, it is  
291 critical to understand “where and in which bird species surveillance is most needed and  
292 could have the greatest impact” [17]. Given sufficient data in the future, our framework  
293 could help conservation and public health policy-making in designing monitoring and  
294 surveillance strategies. More collaboration is needed between ornithologists, movement  
295 ecologists, bird conservation experts, avian influenza epidemiologists, disease ecologists  
296 and virologists on many aspects, including collaborative data collection/surveillance of  
297 AIV and data sharing. For example, if studies were to simultaneously obtain the move-  
298 ment tracking of bird populations and their serology and virology surveillance data, then  
299 they could link the bird movement directly with the virus transmission and dispersal. In  
300 addition, we need more AIV samples from water bodies to better understand environmen-  
301 tal transmission. With such data, we would be able to understand the viral transmission

302 at local scales and therefore develop disease models for bird conservation and potential  
303 zoonotic threats.

## 304 4 Materials and Methods

### 305 4.1 Wild bird movement tracking and distribution modeling

306 To assemble the global wild bird observation data, we accessed the worldwide bird track-  
307 ing data from Movebank in 2021. This dataset amassed from 53 studies across the world  
308 [40–119]. The Movebank study ID, name, principal investigator, and contact person are  
309 listed in Table S6. The dataset is collected by various research groups, and by various  
310 sensors, including Global Position System (GPS), Argos, bird ring, radio transmitter,  
311 solar geo-locator, and natural mark. It covers over 3542 individual birds (class: Ave),  
312 including 10 orders and 95 species (Table S1). For further modelling the migration of the  
313 wild birds belonging to different orders, we excluded the observation data on Movebank of  
314 Cuculiformes, Caprimulgiformes, Strigiformes, Columbiformes, Phoenicopteriformes, Pi-  
315 ciformes, Sphenisciformes, and Procellariiformes, given their paucity and geographically  
316 restricted distribution. Additionally, we accessed GPS tracking data of 193 individuals,  
317 including 5 orders and 12 Species between 2006 and 2019 in China from a previous study  
318 ([120]). Accordingly, we combined the data from China with those on Movebank (Table  
319 S6) and finalized a bird observation dataset consisting of 10 orders and 96 species.

320 To model the wild bird distribution throughout a year, we developed a model frame-  
321 work based on the species distribution model (SDM). The response variable of the model  
322 is bird occurrence (1: presence; 0: pseudo-absence). The independent variables are 20  
323 well-studied environmental predictors, including local topography, weather conditions,  
324 and time of the season. Table S2 lists the environmental data and the source. We divide  
325 the globe into 1-km resolution geographical cells for each month. For each cell, the value  
326 of the dependent variable is 1 if there is any observation of an individual in the target  
327 order in that month in the bird tracking data, otherwise 0. Furthermore, to infer the  
328 probability of bird occurrence between 0 and 1 for each cell, we trained a XGBoost bi-  
329 nary classification model [121] for each bird order, respectively. The method is adapted  
330 from a previous bird migration model [122]. We used true presence and pseudo-absence  
331 data (marked as 1 and 0 respectively). We fitted the distribution of birds which manifest  
332 as true-presence data and pseudo-absence data. We randomly divided 67% of the data  
333 as the training set and the other 33% as the test set. The model finally outputs the  
334 probability of the distribution of migratory birds in each month across years (Dataset 6).  
335 The accuracy was evaluated by the area under the curve (AUC) in a test set of the ten

336 orders: Pelecaniformes (0.97), Gruiformes (0.97), Passeriformes (0.97), Suliformes (0.98),  
337 Ciconiiformes (0.92), Falconiformes (0.98), Charadriiformes (0.94), Anseriformes (0.90),  
338 Accipitriformes (0.90). The modelled wild bird distribution (Dataset 6) was applied in the  
339 subsequent analysis to identify key bird orders associated with the global viral dispersal  
340 (section 4.3) and local virus emergence.

## 341 **4.2 Viral sequence data and time-scaled phylogeny of HPAIVs**

342 To infer the phylogeny of avian influenza HPAIV H5 viruses, we accessed sequences of  
343 HA genes, NA genes and six internal gene segments from GISAID (Global Initiative on  
344 Sharing All Influenza Data [123–125]). Using the sequences, we estimated a maximum  
345 likelihood phylogeny (Figure S3) for each gene segment, respectively, under a GTR+ $\gamma$   
346 nucleotide substitution model, with the randomly selected strains as representatives, by  
347 FastTree v2.1.4 [126]. Genotypes of internal gene segments (Figure S3) were defined by  
348 clustering pattern with background sequences in a previous study [127]. On the phylogeny,  
349 the viruses with internal genes from wild birds, e.g. clade 2.3.2.1 and clade 2.3.4.4, showed  
350 wider geographical spread [1, 23], compared to poultry viruses, e.g. clade 2.3.4.1 and clade  
351 2.2, despite the high similarity of their HA genes. This demonstrates the importance  
352 of gene reassortment in the evolution and transmission of HPAIVs. In this project, we  
353 focused on clade 2.3.4.4 and clade 2.3.2.1. Next, we inferred their time-scaled phylogenies  
354 of HA genes. Before the inference, to test for the presence of phylogenetic temporal  
355 structure, we generated a scatter-plot of root-to-tip genetic divergence against sampling  
356 date by TempEst v1.5 [128]. Strong phylogenetic temporal structure was detected in  
357 the phylogeny of each clade (Figure S7). The final datasets (Dataset 2) were i) 1163  
358 HA sequences of clade 2.3.2.1 ii) 1844 HA sequences of clade 2.3.4.4. The spatial and  
359 temporal distribution of the sequences is shown in Figure S4.

360 Time-resolved HA phylogenies were estimated using the Markov chain Monte Carlo  
361 (MCMC) approach implemented in BEAST v1.10.4 [129] with the BEAGLE library  
362 [130]. We used an uncorrelated lognormal (UCLN) relaxed molecular clock model [131],  
363 the SRD06 nucleotide substitution model [132] and the Gaussian Markov random field  
364 (GMRF) Bayesian Skyride coalescent tree prior [133]. For each dataset, MCMC chains  
365 were run for 300 million (clade 2.3.2.1) and 400 million (clade 2.3.4.4) generations with  
366 burn-in of 10%, sampling every 10,000 steps. Convergence of MCMC chains was checked  
367 with Tracer v1.7 [134]. A set of 1000 trees for each clade was subsampled from the MCMC  
368 chain and used as an empirical tree distribution for the subsequent analysis.

### 369 **4.3 Discrete trait phylogeography of HPAIVs and counts of** 370 **virus lineage migration**

371 Based on empirical phylogenies, we used a non-reversible discrete-state continuous time  
372 Markov chain (CTMC) model and a Bayesian stochastic search variable selection (BSSVS)  
373 approach [31] to infer the viral diffusion among locations: i) the most probable locations  
374 of the ancestral nodes in the phylogeny and ii) the history and rates of lineage movement  
375 among locations [31]. Sampled countries were divided into 10 locations: Africa, Central  
376 Asia, Europe, Japan-Korea, North China, South China, Qinghai, Russia, Southeast Asia  
377 and USA-Canada. This regional categorization was done according to the major wild bird  
378 breeding areas. Furthermore, to estimate the viral gene flows between locations, we used  
379 a robust counting approach [135, 136] to count virus lineage migration events. The basic  
380 idea is to count the expected number of lineage movements (Markov jumps) between  
381 the locations along the phylogeny branches, as applied in previous studies [137–141]. For  
382 each location, the frequency distribution throughout a year of the Markov jumps from  
383 or to the place is summarized. Using this method, we summarized monthly frequency  
384 distribution of the virus lineage migration for each pathway (Figure S5, Dataset 4). This  
385 was used for further analysis below.

386 To target the key bird orders for each location, we explored the association of wild  
387 bird distribution across a year and the virus diffusion. The monthly wild bird distribution  
388 probability at each location (Dataset 5) is generated based on the location's geographical  
389 coordinates on the modelled bird distribution probability raster map (Dataset 6). We  
390 calculated the correlation between the virus lineage migration and the bird probability  
391 distribution at origin and destination regions, respectively, with time lags from -7 to 7.  
392 To account for multiple comparisons of 9 bird orders, we use  $p$  value  $< 0.00556 (= 0.05/9)$   
393 to define the statistical significance in the correlations. When bird distribution at the  
394 origin leads to the virus lineage movements positively or negatively, we consider the bird  
395 order distribution at the origin to be correlated with the virus lineage movements (Table  
396 S4.1, Figure 2A). When bird distribution at the sink is positively associated with the  
397 virus lineage movement, we consider the bird order distribution at the sink is correlated  
398 with the virus lineage movement (Table S4.2, Figure 2A).

### 399 **4.4 Animal mobility networks and their contribution to HPAIV** 400 **phylogeography**

401 The bird migration network (Figure 1C, D) was summarised by searching publicly avail-  
402 able migration data on Movebank. An edge between two locations in the network exists if

403 any migration tracking record shows bird migration. The location-wise live poultry trade  
404 values (Dataset 1) were summed up from country-wise import and export of the live  
405 poultry recorded on United Nations Comtrade Database ([comtrade.un.org/data/](http://comtrade.un.org/data/)). We  
406 accessed the total net weight and trade value from 1996 to 2016 of live poultry, including  
407 fowls of the species *Gallus domesticus*, ducks, geese, turkeys and guinea fowls. Since  
408 there are no accessible data of the within-country poultry trade in China, we adapted  
409 the inferred poultry trade accessibility between provinces of China from a previous study  
410 [142]. Based on the ratio of the inferred accessibility and the empirical trade value be-  
411 tween Hong Kong SAR and the mainland of China, we scaled all the accessibility to the  
412 trade value flows among Qinghai, North China and South China.

413 With the summarized seasonal-varying bird migration network, we statistically quan-  
414 tified the contribution of wild bird migration to avian influenza virus dispersal. We  
415 applied the generalized linear model (GLM) extended Bayesian phylogeography inference  
416 [32] with the 1000 empirical trees as the input. The 11 categorized locations in the pre-  
417 vious discrete trait phylogeography were still used. The epoch model [33] was used to  
418 model the time heterogeneity of the contribution. To explain the contribution of the bird  
419 migration and the respective seasonal migration, we also separated the network of spring  
420 migration and that of the fall as two predictors for comparison (Figure S6). For each  
421 clade and each predictor group, MCMC chains were run for 100 million generations with  
422 burn-in of 10%, sampling every 10,000 steps. Similarly, we assessed the convergence of  
423 the chains in Tracer v1.7 [134].

## 424 5 Acknowledgements

425 We gratefully acknowledge all bird tracking data contributors, i.e., the authors and other  
426 researchers in their originating groups collecting the data and metadata and sharing via  
427 Movebank, on which this research is based. The principle investigator, contact person,  
428 citation or data repository DOI are listed in Supplementary Table S6. We also grate-  
429 fully acknowledge all data contributors of virus genome sequences, i.e., the authors and  
430 their originating laboratories responsible for obtaining the specimens, and their submit-  
431 ting laboratories for generating the genetic sequence and metadata and sharing via the  
432 GISAID Initiative, on which this research is based.

433 We thank Qizhong Wu and Joint Center for Earth System Modeling and High Per-  
434 formance Computing, Beijing Normal University, for providing computing resources for  
435 time-scaled phylogenetic analyses. We thank Jing Yu for assisting in assembling inter-  
436 national poultry trade data. We thank Bram Vrancken for assisting with phylogenetic  
437 analyses. We thank insightful comments from Andrew Rambaut and the Virus Club

438 Group at the University of Edinburgh, Grenfell lab at Princeton University, the Influenza  
439 group at Francis Crick Institute, Olga Alexandrou at Society for the Protection of Prespa,  
440 Yonghong Liu at Chinese Center for Disease Control and Prevention, Yidan Li (formerly  
441 at Beijing Normal University), and Nils Stenseth at the University of Oslo. Y.H. is sup-  
442 ported by a Masason Foundation Fellowship, a Honjo International Fellowship, and a  
443 Centennial Fellowship. The opinions expressed in this article are those of the authors  
444 and do not reflect the view of the National Institutes of Health, the Department of Health  
445 and Human Services, or the United States government.

## 446 References

- 447 1. Smith, G. J. & Donis, R. O. Nomenclature updates resulting from the evolution of  
448 avian influenza A(H5) virus clades 2.1.3.2a, 2.2.1, and 2.3.4 during 2013-2014. *In-*  
449 *fluenza and other Respiratory Viruses* **9**. ISBN: 1750-2640, 271–276. ISSN: 17502659  
450 (2015).
- 451 2. Wille, M. & Barr, I. G. Resurgence of avian influenza virus. *Science* **376**. Publisher:  
452 American Association for the Advancement of Science, 459–460. <https://www.science.org/doi/10.1126/science.abo1232> (2022) (Apr. 29, 2022).
- 453 3. *2020: OIE - World Organisation for Animal Health* en. <https://www.oie.int/animal-health-in-the-world/update-on-avian-influenza/2020/> (2021).
- 454 4. Beerens, N. *et al.* Multiple Reassorted Viruses as Cause of Highly Pathogenic Avian  
455 Influenza A(H5N8) Virus Epidemic, the Netherlands, 2016. *Emerging Infectious*  
456 *Diseases* **23**, 1974–1981. ISSN: 1080-6040. <https://www.ncbi.nlm.nih.gov/pmc/articles/PMC5708218/> (2021) (Dec. 2017).
- 457 5. Kwon, J.-H. *et al.* New Reassortant Clade 2.3.4.4b Avian Influenza A(H5N6) Virus  
458 in Wild Birds, South Korea, 2017–18. *Emerging Infectious Diseases* **24**, 1953–1955.  
459 ISSN: 1080-6040. <https://www.ncbi.nlm.nih.gov/pmc/articles/PMC6154165/>  
460 (2021) (Oct. 2018).
- 461 6. Mine, J. *et al.* Genetics and pathogenicity of H5N6 highly pathogenic avian in-  
462 fluenza viruses isolated from wild birds and a chicken in Japan during winter 2017-  
463 2018. eng. *Virology* **533**, 1–11. ISSN: 1096-0341 (July 2019).
- 464 7. Lee, D.-h., Bertran, K., Kwon, J.-h. & Swayne, D. E. Evolution, global spread, and  
465 pathogenicity of highly pathogenic avian influenza H5Nx clade 2.3.4.4. *J Vet Sci*  
466 **18**. ISBN: 1706546343, 269–280 (2017).

- 470 8. Update on Avian Influenza A (H5N1) Virus Infection in Humans. *New England*  
471 *Journal of Medicine* **358**. Publisher: Massachusetts Medical Society \_eprint: <https://doi.org/10.1056/NEJMr0707279> (2021)  
472 261–273. ISSN: 0028-4793. <https://doi.org/10.1056/NEJMr0707279> (2021)  
473 (Jan. 2008).
- 474 9. Gao, R. *et al.* Human Infection with a Novel Avian-Origin Influenza A (H7N9)  
475 Virus. *New England Journal of Medicine* **368**. Publisher: Massachusetts Medical  
476 Society \_eprint: <https://doi.org/10.1056/NEJMoa1304459>, 1888–1897. ISSN: 0028-  
477 4793. <https://doi.org/10.1056/NEJMoa1304459> (2021) (May 2013).
- 478 10. Yang, Z.-F., Mok, C. K., Peiris, J. S. & Zhong, N.-S. Human Infection with a Novel  
479 Avian Influenza A(H5N6) Virus. *New England Journal of Medicine* **373**. Publisher:  
480 Massachusetts Medical Society \_eprint: <https://doi.org/10.1056/NEJMc1502983>,  
481 487–489. ISSN: 0028-4793. <https://doi.org/10.1056/NEJMc1502983> (2021)  
482 (July 2015).
- 483 11. First identification of human cases of avian influenza A (H5N8) infection. en, 9.
- 484 12. Peiris, J. S. M., de Jong, M. D. & Guan, Y. Avian Influenza Virus (H5N1): a  
485 Threat to Human Health. *Clinical Microbiology Reviews* **20**. Publisher: American  
486 Society for Microbiology, 243–267. [https://journals.asm.org/doi/full/10.](https://journals.asm.org/doi/full/10.1128/CMR.00037-06)  
487 [1128/CMR.00037-06](https://journals.asm.org/doi/full/10.1128/CMR.00037-06) (2022) (Apr. 2007).
- 488 13. Grund, C. *et al.* A novel European H5N8 influenza A virus has increased virulence  
489 in ducks but low zoonotic potential. *Emerging Microbes & Infections* **7**. Publisher:  
490 Taylor & Francis \_eprint: <https://doi.org/10.1038/s41426-018-0130-1>, 1–14. ISSN:  
491 null. <https://doi.org/10.1038/s41426-018-0130-1> (2022) (Dec. 1, 2018).
- 492 14. Leyson, C. M., Youk, S., Ferreira, H. L., Suarez, D. L. & Pantin-Jackwood, M.  
493 Multiple Gene Segments Are Associated with Enhanced Virulence of Clade 2.3.4.4  
494 H5N8 Highly Pathogenic Avian Influenza Virus in Mallards. *Journal of Virology*  
495 **95**. Publisher: American Society for Microbiology, e00955–21. [https://journals.](https://journals.asm.org/doi/10.1128/JVI.00955-21)  
496 [asm.org/doi/10.1128/JVI.00955-21](https://journals.asm.org/doi/10.1128/JVI.00955-21) (2022) (2021).
- 497 15. European Food Safety Authority, European Centre for Disease Prevention, Con-  
498 trol, European Union Reference Laboratory for Avian Influenza *et al.* Avian In-  
499 fluenza Overview December 2021 – March 2022. *EFSA Journal* **20**. ISSN: 18314732,  
500 18314732. <https://data.europa.eu/doi/10.2903/j.efsa.2022.7289> (2022)  
501 (Apr. 2022).

- 502 16. Trovão, N. S., Suchard, M. A., Baele, G., Gilbert, M. & Lemey, P. Bayesian Infer-  
503 ence Reveals Host-Specific Contributions to the Epidemic Expansion of Influenza  
504 A H5N1. *Molecular Biology and Evolution* **32**, 3264–3275. ISSN: 0737-4038. <https://doi.org/10.1093/molbev/msv185> (2021) (Dec. 2015).
- 506 17. Russell, C. A. Sick birds don't fly...or do they? *Science* **354**. ISBN: 1095-9203  
507 (Electronic) 0036-8075 (Linking), 174–175. ISSN: 10959203 (2016).
- 508 18. Krauss, S. *et al.* The enigma of the apparent disappearance of Eurasian highly  
509 pathogenic H5 clade 2.3.4.4 influenza A viruses in North American waterfowl.  
510 en. *Proceedings of the National Academy of Sciences* **113**. Publisher: National  
511 Academy of Sciences Section: Biological Sciences, 9033–9038. ISSN: 0027-8424,  
512 1091-6490. <https://www.pnas.org/content/113/32/9033> (2021) (Aug. 2016).
- 513 19. Dennis, N. Are Wild Birds to Blame ? *Science* **310**, 426–428 (2005).
- 514 20. Kim, Y.-I. *et al.* Pathobiological features of a novel, highly pathogenic avian in-  
515 fluenza A(H5N8) virus. *Emerging Microbes & Infections* **3**. Publisher: Taylor &  
516 Francis, 1–13. ISSN: 2222-1751. [https://www.tandfonline.com/doi/full/10.](https://www.tandfonline.com/doi/full/10.1038/emi.2014.75)  
517 [1038/emi.2014.75](https://www.tandfonline.com/doi/full/10.1038/emi.2014.75) (Jan. 2014).
- 518 21. Kang, H.-M. *et al.* Novel Reassortant Influenza A(H5N8) Viruses among Inoculated  
519 Domestic and Wild Ducks, South Korea, 2014. *Emerging Infectious Diseases* **21**,  
520 298–304. ISSN: 1080-6040. [https://www.ncbi.nlm.nih.gov/pmc/articles/](https://www.ncbi.nlm.nih.gov/pmc/articles/PMC4313655/)  
521 [PMC4313655/](https://www.ncbi.nlm.nih.gov/pmc/articles/PMC4313655/) (2021) (Feb. 2015).
- 522 22. Sun, H. *et al.* Characterization of clade 2.3.4.4 highly pathogenic H5 avian influenza  
523 viruses in ducks and chickens. *Veterinary Microbiology* **182**. Publisher: Elsevier  
524 B.V., 116–122. ISSN: 18732542. [http://dx.doi.org/10.1016/j.vetmic.2015.](http://dx.doi.org/10.1016/j.vetmic.2015.11.001)  
525 [11.001](http://dx.doi.org/10.1016/j.vetmic.2015.11.001) (2016).
- 526 23. Lycett, S. J. *et al.* Role for migratory wild birds in the global spread of avian in-  
527 fluenza H5N8. *Science* **354**. ISBN: 1095-9203 (Electronic)\$\backslash\$backslash\$0036-8075  
528 (Linking), 213–217. ISSN: 0036-8075. [http://www.sciencemag.org/cgi/doi/10.](http://www.sciencemag.org/cgi/doi/10.1126/science.aaf8852)  
529 [1126/science.aaf8852](http://www.sciencemag.org/cgi/doi/10.1126/science.aaf8852) (Oct. 2016).
- 530 24. Blaurock, C. *et al.* Preferential Selection and Contribution of Non-Structural Pro-  
531 tein 1 (NS1) to the Efficient Transmission of Panzootic Avian Influenza H5N8 Virus  
532 Clades 2.3.4.4A and B in Chickens and Ducks. *Journal of Virology* **95**. Publisher:  
533 American Society for Microbiology, e00445–21. [https://journals.asm.org/doi/](https://journals.asm.org/doi/10.1128/JVI.00445-21)  
534 [10.1128/JVI.00445-21](https://journals.asm.org/doi/10.1128/JVI.00445-21) (2022) (2021).



- 535 25. Lycett, S. J. *et al.* Genesis and spread of multiple reassortants during the 2016/2017  
536 H5 avian influenza epidemic in Eurasia. *Proceedings of the National Academy of*  
537 *Sciences of the United States of America* **117**, 20814–20825. ISSN: 10916490 (2020).
- 538 26. Hill, S. C. *et al.* Comparative Micro-Epidemiology of Pathogenic Avian Influenza  
539 Virus Outbreaks in a Wild Bird Population. *Philosophical Transactions of the Royal*  
540 *Society B: Biological Sciences* **374**, 20180259. [https://royalsocietypublishing.](https://royalsocietypublishing.org/doi/10.1098/rstb.2018.0259)  
541 [org/doi/10.1098/rstb.2018.0259](https://royalsocietypublishing.org/doi/10.1098/rstb.2018.0259) (2022) (June 24, 2019).
- 542 27. Reeves, A. B. *et al.* Influenza A virus recovery, diversity, and intercontinental ex-  
543 change: A multi-year assessment of wild bird sampling at Izembek National Wildlife  
544 Refuge, Alaska. *PLOS ONE* **13**. Publisher: Public Library of Science, e0195327.  
545 ISSN: 1932-6203. [https://journals.plos.org/plosone/article?id=10.1371/](https://journals.plos.org/plosone/article?id=10.1371/journal.pone.0195327)  
546 [journal.pone.0195327](https://journals.plos.org/plosone/article?id=10.1371/journal.pone.0195327) (2022) (Apr. 5, 2018).
- 547 28. Van Dijk, J. G. B. *et al.* Juveniles and migrants as drivers for seasonal epizootics of  
548 avian influenza virus. *Journal of Animal Ecology* **83**. eprint: [https://onlinelibrary.wiley.com/doi/](https://onlinelibrary.wiley.com/doi/10.1111/1365-2656.12131)  
549 [10.1111/1365-2656.12131](https://onlinelibrary.wiley.com/doi/10.1111/1365-2656.12131), 266–275. ISSN: 1365-2656. [https://onlinelibrary.wiley.com/doi/](https://onlinelibrary.wiley.com/doi/abs/10.1111/1365-2656.12131)  
550 [abs/10.1111/1365-2656.12131](https://onlinelibrary.wiley.com/doi/abs/10.1111/1365-2656.12131) (2022) (2014).
- 551 29. Hill, N. J. *et al.* Ecological divergence of wild birds drives avian influenza spillover  
552 and global spread. *PLOS Pathogens* **18**. Publisher: Public Library of Science,  
553 e1010062. ISSN: 1553-7374. [https://journals.plos.org/plospathogens/](https://journals.plos.org/plospathogens/article?id=10.1371/journal.ppat.1010062)  
554 [article?id=10.1371/journal.ppat.1010062](https://journals.plos.org/plospathogens/article?id=10.1371/journal.ppat.1010062) (2022) (May 19, 2022).
- 555 30. Hicks, J. T. *et al.* Host diversity and behavior determine patterns of interspecies  
556 transmission and geographic diffusion of avian influenza A subtypes among North  
557 American wild reservoir species. *PLOS Pathogens* **18**. Publisher: Public Library of  
558 Science, e1009973. ISSN: 1553-7374. [https://journals.plos.org/plospathogens/](https://journals.plos.org/plospathogens/article?id=10.1371/journal.ppat.1009973)  
559 [article?id=10.1371/journal.ppat.1009973](https://journals.plos.org/plospathogens/article?id=10.1371/journal.ppat.1009973) (2022) (Apr. 13, 2022).
- 560 31. Lemey, P., Rambaut, A., Drummond, A. J. & Suchard, M. A. Bayesian Phylo-  
561 geography Finds Its Roots. *PLoS Computational Biology* **5** (ed Fraser, C.) ISBN:  
562 1553-734X, e1000520. ISSN: 1553-7358. [https://dx.plos.org/10.1371/journal.](https://dx.plos.org/10.1371/journal.pcbi.1000520)  
563 [pcbi.1000520](https://dx.plos.org/10.1371/journal.pcbi.1000520) (Sept. 2009).
- 564 32. Lemey, P. *et al.* Unifying Viral Genetics and Human Transportation Data to Pre-  
565 dict the Global Transmission Dynamics of Human Influenza H3N2. *PLoS pathogens*  
566 **10**. ISBN: 1553-7374 (Electronic) [10.1371/journal.ppat.1000520](https://doi.org/10.1371/journal.ppat.1000520) (Linking), 1–17. ISSN:  
567 1553-7374. [http://www.scopus.com/inward/record.url?eid=2-s2.0-](http://www.scopus.com/inward/record.url?eid=2-s2.0-84895733259&partnerID=tZ0tx3y1)  
568 [84895733259&partnerID=tZ0tx3y1](http://www.scopus.com/inward/record.url?eid=2-s2.0-84895733259&partnerID=tZ0tx3y1) (2014).

- 569 33. Bielejec, F., Lemey, P., Baele, G., Rambaut, A. & Suchard, M. Inferring heteroge-  
570 neous evolutionary processes through time: from sequence substitution to phylo-  
571 geography. en. *Syst Biol* **63**, 493–504 (2014).
- 572 34. Ramey, A. M. *et al.* Highly pathogenic avian influenza is an emerging disease threat  
573 to wild birds in North America. *The Journal of Wildlife Management* **86**. eprint:  
574 <https://onlinelibrary.wiley.com/doi/pdf/10.1002/jwmg.22171>, e22171. ISSN: 1937-  
575 2817. <https://onlinelibrary.wiley.com/doi/abs/10.1002/jwmg.22171>  
576 (2022) (2022).
- 577 35. Wille, M. *et al.* Australia as a Global Sink for the Genetic Diversity of Avian  
578 Influenza A Virus. *PLOS Pathogens* **18**, e1010150. ISSN: 1553-7374. [https://](https://journals.plos.org/plospathogens/article?id=10.1371/journal.ppat.1010150)  
579 [journals.plos.org/plospathogens/article?id=10.1371/journal.ppat.](https://journals.plos.org/plospathogens/article?id=10.1371/journal.ppat.1010150)  
580 1010150 (2023) (May 10, 2022).
- 581 36. Van Toor, M. L., Avril, A., Wu, G., Holan, S. H. & Waldenström, J. As the Duck  
582 Flies—Estimating the Dispersal of Low-Pathogenic Avian Influenza Viruses by  
583 Migrating Mallards. *Frontiers in Ecology and Evolution* **6**. ISSN: 2296-701X. [https://](https://www.frontiersin.org/article/10.3389/fevo.2018.00208)  
584 [www.frontiersin.org/article/10.3389/fevo.2018.00208](https://www.frontiersin.org/article/10.3389/fevo.2018.00208) (2022) (2018).
- 585 37. Van Toor, M. L. *et al.* Integrating animal movement with habitat suitability for  
586 estimating dynamic migratory connectivity. *Landscape Ecology* **33**, 879–893. ISSN:  
587 1572-9761. <https://doi.org/10.1007/s10980-018-0637-9> (2022) (June 1,  
588 2018).
- 589 38. Skehel, J. J. & Wiley, D. C. Receptor Binding and Membrane Fusion in Virus  
590 Entry: The Influenza Hemagglutinin. *Annual Review of Biochemistry* **69**, 531–69.  
591 ISSN: 00664154. [https://www.proquest.com/docview/223690008/abstract/](https://www.proquest.com/docview/223690008/abstract/D796D35D31C8400FPQ/1)  
592 [D796D35D31C8400FPQ/1](https://www.proquest.com/docview/223690008/abstract/D796D35D31C8400FPQ/1) (2023) (2000).
- 593 39. Gaidet, N. *et al.* Understanding the ecological drivers of avian influenza virus infec-  
594 tion in wildfowl: a continental-scale study across Africa. *Proceedings of the Royal*  
595 *Society B: Biological Sciences* **279**. Publisher: Royal Society, 1131–1141. [https://](https://royalsocietypublishing.org/doi/full/10.1098/rspb.2011.1417)  
596 [royalsocietypublishing.org/doi/full/10.1098/rspb.2011.1417](https://royalsocietypublishing.org/doi/full/10.1098/rspb.2011.1417) (2022)  
597 (Mar. 22, 2012).
- 598 40. Warwick-Evans, V. *et al.* *Data from: Changes in Behaviour Drive Inter-annual*  
599 *Variability in the At-sea Distribution of Northern Gannets* 2017.
- 600 41. Friedemann, G., Leshem, Y. & Izhaki, I. *Data from: Multidimensional Differentia-*  
601 *tion in Foraging Resource Use during Breeding of Two Sympatric Raptors: Space,*  
602 *Habitat Type, Time and Food* 2016.

- 603 42. Hallworth, M. & Marra, P. *Data from: Miniaturized GPS Tags Identify Non-*  
604 *Breeding Territories of a Small Breeding Migratory Songbird* 2015.
- 605 43. Petersen, M. & Douglas, D. *Data from: At-sea Distribution of Spectacled Eiders:*  
606 *A 120-Year-Old Mystery Resolved* 2016.
- 607 44. Spiegel, O., Getz, W. & Nathan, R. *Data from: Factors Influencing Foraging Search*  
608 *Efficiency: Why Do Scarce Lappet-Faced Vultures Outperform Ubiquitous White-*  
609 *Backed Vultures? (V2)* 2014.
- 610 45. Arlt, D., Olsson, P., Fox, J., Low, M. & Pärt, T. *Data from: Prolonged Stopover*  
611 *Duration Characterises Migration Strategy and Constraints of a Long-Distant Mi-*  
612 *grant Songbird* 2015.
- 613 46. Kleyheeg, E., van,Dijk, J., Nolet, B. & Soons, M. *Data from: Movement Patterns of*  
614 *a Keystone Waterbird Species Are Highly Predictable from Landscape Configuration*  
615 2017.
- 616 47. Exo, K. *Data from: Forecasting Spring from Afar? Timing of Migration and Pre-*  
617 *dictability of Phenology along Different Migration Routes of an Avian Herbivore*  
618 *[Barents Sea Data]*
- 619 48. Descamps, S. *et al. Data from: At-sea Distribution and Prey Selection of Antarctic*  
620 *Petrels and Commercial Krill Fisheries* 2016.
- 621 49. Chudzińska, M. & Madsen, J. *Data from: Foraging Behaviour and Fuel Accumula-*  
622 *tion of Capital Breeders during Spring Migration as Derived from a Combination*  
623 *of Satellite- and Ground-Based Observations* 2016.
- 624 50. Hernández-Pliego, J., Rodriguez, C. & Bustamante, J. *Data from: Why Do Kestrels*  
625 *Soar?* 2015.
- 626 51. Kölzsch, A., Kruckenberg, H., Glazov, P., Müskens, G. & Wikelski, M. *Data from:*  
627 *Towards a New Understanding of Migration Timing: Slower Spring than Autumn*  
628 *Migration in Geese Reflects Different Decision Rules for Stopover Use and Depar-*  
629 *ture* 2016.
- 630 52. Arlt, D., Olsson, P., Fox, J. W., Low, M. & Pärt, T. Prolonged Stopover Dura-  
631 tion Characterises Migration Strategy and Constraints of a Long-Distance Migrant  
632 Songbird. *Animal Migration* **2**, 47–62. ISSN: 2084-8838 (Jan. 2015).
- 633 53. Bengtsson, D. *et al. Does Influenza A Virus Infection Affect Movement Behaviour*  
634 *during Stopover in Its Wild Reservoir Host? Royal Society Open Science* **3**, 150633.

- 635 54. Bengtsson, D. *et al.* Movements, Home-Range Size and Habitat Selection of Mal-  
636 lards during Autumn Migration. *PLOS ONE* **9**, e100764. ISSN: 1932-6203 (June  
637 2014).
- 638 55. Boyd, W. S., Ward, D. H., Kraege, D. K. & Gerick, A. A. Migration Patterns of  
639 Western High Arctic (Grey-belly) Brant Branta Bernicla. *Wildfowl* **3**, 3–25 (2013).
- 640 56. Bravo, S. P., Cueto, V. R. & Gorosito, C. A. Migratory Timing, Rate, Routes  
641 and Wintering Areas of White-crested Elaenia (*Elaenia Albiceps Chilensis*), a Key  
642 Seed Disperser for Patagonian Forest Regeneration. *PLOS ONE* **12**, e0170188.  
643 ISSN: 1932-6203 (Feb. 2017).
- 644 57. Chudzińska, M. E., Nabe-Nielsen, J., Nolet, B. A. & Madsen, J. Foraging Behaviour  
645 and Fuel Accumulation of Capital Breeders during Spring Migration as Derived  
646 from a Combination of Satellite- and Ground-Based Observations. *Journal of Avian  
647 Biology* **47**, 563–574. ISSN: 1600-048X (2016).
- 648 58. Cochran, W. & Wikelski, M. in *Birds of Two Worlds: The Ecology and Evolution  
649 of Migration* (The Johns Hopkins University Press, Baltimore, 2005). ISBN: 978-0-  
650 8018-8107-7.
- 651 59. Cochran, W. W., Bowlin, M. S. & Wikelski, M. Wingbeat Frequency and Flap-  
652 Pause Ratio during Natural Migratory Flight in Thrushes. *Integrative and Com-  
653 parative Biology* **48**, 134–151. ISSN: 1540-7063 (July 2008).
- 654 60. DeLuca, W. V. *et al.* Transoceanic Migration by a 12 g Songbird. *Biology Letters*  
655 **11**, 20141045 (Apr. 2015).
- 656 61. Descamps, S. *et al.* At-Sea Distribution and Prey Selection of Antarctic Petrels  
657 and Commercial Krill Fisheries. *PLOS ONE* **11**, e0156968. ISSN: 1932-6203 (Aug.  
658 2016).
- 659 62. van Toor, M., Ottosson, U., van der Meer, T., van Hoorn, S. & Waldenström,  
660 J. *Data from: As the duck flies: estimating the dispersal of low-pathogenic avian  
661 influenza viruses by migrating mallards* 2018. [http://dx.doi.org/10.5441/001/  
662 1.3fv21n7m](http://dx.doi.org/10.5441/001/1.3fv21n7m).
- 663 63. Efrat, R., Harel, R., Alexandrou, O., Catsadorakis, G. & Nathan, R. Seasonal  
664 Differences in Energy Expenditure, Flight Characteristics and Spatial Utilization  
665 of Dalmatian Pelicans *Pelecanus Crispus* in Greece. *Ibis* **161**, 415–427. ISSN: 1474-  
666 919X (2019).

- 667 64. Efrat, R., Harel, R., Alexandrou, O., Catsadorakis, G. & Nathan, R. Seasonal  
668 Differences in Energy Expenditure, Flight Characteristics and Spatial Utilization  
669 of Dalmatian Pelicans *Pelecanus Crispus* in Greece. *Ibis* **161**, 415–427. ISSN: 0019-  
670 1019, 1474-919X (Apr. 2019).
- 671 65. Eichhorn, G. in *Seeking Nature's Limits: Ecologists in the Field* trans. by Drent,  
672 R. H., 84–90 (KNNV Pub., Utrecht, 2005). ISBN: 978-90-5011-221-5.
- 673 66. Eichhorn, G. *Travels in a Changing World Flexibility and Constraints in Migration*  
674 *and Breeding of the Barnacle Goose* Thesis Fully Internal (DIV) (s.n., 2008). ISBN:  
675 9789036734486.
- 676 67. Flack, A. *et al.* Costs of Migratory Decisions: A Comparison across Eight White  
677 Stork Populations. *Science Advances* **2**, e1500931 (Jan. 2016).
- 678 68. Flack, A., Nagy, M., Fiedler, W., Couzin, I. D. & Wikelski, M. From Local Collec-  
679 tive Behavior to Global Migratory Patterns in White Storks. *Science* **360**, 911–914  
680 (May 2018).
- 681 69. Fleishman, E. *et al.* Space Use by Swainson's Hawk (*Buteo Swainsoni*) in the  
682 Natomas Basin, California. *Collabra* **2**, 5. ISSN: 2376-6832 (Apr. 2016).
- 683 70. Friedemann, G. *et al.* Multidimensional Differentiation in Foraging Resource Use  
684 during Breeding of Two Sympatric Top Predators. *Scientific Reports* **6**, 35031.  
685 ISSN: 2045-2322 (Oct. 2016).
- 686 71. Fuller, M. R., Seegar, W. S. & Schueck, L. S. Routes and Travel Rates of Migrat-  
687 ing Peregrine Falcons *Falco Peregrinus* and Swainson's Hawks *Buteo Swainsoni* in  
688 the Western Hemisphere. *Journal of Avian Biology* **29**, 433–440. ISSN: 0908-8857  
689 (1998).
- 690 72. Hallworth, M. T. & Marra, P. P. Miniaturized GPS Tags Identify Non-breeding  
691 Territories of a Small Breeding Migratory Songbird. *Scientific Reports* **5**, 11069.  
692 ISSN: 2045-2322 (June 2015).
- 693 73. Cueto, V. & Bravo, S. *Data from: Migratory Timing, Rate, Routes and Wintering*  
694 *Areas of White-Crested Elaenia (*Elaenia Albiceps Chilensis*), a Key Seed Disperser*  
695 *for Patagonian Forest Regeneration* 2017.
- 696 74. Harrison, A.-L., Woodard, P., Mallory, M. & Rausch, J. *Sympatrically-Breeding*  
697 *Congeneric Seabirds (*Stercorarius Spp.*) from Arctic Canada Migrate to Four Oceans*  
698 2021.

- 699 75. Harrison, A.-L., Woodard, P. F., Mallory, M. L. & Rausch, J. Sympatrically Breed-  
700 ing Congeneric Seabirds (*Stercorarius* Spp.) from Arctic Canada Migrate to Four  
701 Oceans. *Ecology and Evolution* **12**, e8451. ISSN: 2045-7758 (2022).
- 702 76. Hernández-Pliego, J., Rodríguez, C. & Bustamante, J. Why Do Kestrels Soar?  
703 *PLOS ONE* **10**, e0145402. ISSN: 1932-6203 (Dec. 2015).
- 704 77. Klein, K. *et al.* Fly with the Flock: Immersive Solutions for Animal Movement  
705 Visualization and Analytics. *Journal of The Royal Society Interface* **16**, 20180794  
706 (Apr. 2019).
- 707 78. Kleyheeg, E. *et al.* Movement Patterns of a Keystone Waterbird Species Are Highly  
708 Predictable from Landscape Configuration. *Movement Ecology* **5**, 2. ISSN: 2051-  
709 3933 (Feb. 2017).
- 710 79. Kochert, M. N. *et al.* Migration Patterns, Use of Stopover Areas, and Austral  
711 Summer Movements of Swainson’s Hawks. *The Condor* **113**, 89–106. ISSN: 1938-  
712 5129 (Feb. 2011).
- 713 80. Kölzsch, A. *et al.* Forecasting Spring from Afar? Timing of Migration and Pre-  
714 dictability of Phenology along Different Migration Routes of an Avian Herbivore.  
715 *Journal of Animal Ecology* **84**, 272–283. ISSN: 1365-2656 (2015).
- 716 81. Kölzsch, A. *et al.* Towards a New Understanding of Migration Timing: Slower  
717 Spring than Autumn Migration in Geese Reflects Different Decision Rules for  
718 Stopover Use and Departure. *Oikos* **125**, 1496–1507. ISSN: 1600-0706 (2016).
- 719 82. Köppen, U., Yakovlev, A. P., Barth, R., Kaatz, M. & Berthold, P. Seasonal Mi-  
720 grations of Four Individual Bar-Headed Geese *Anser Indicus* from Kyrgyzstan Fol-  
721 lowed by Satellite Telemetry. *Journal of Ornithology* **151**, 703–712. ISSN: 2193-7206  
722 (July 2010).
- 723 83. Korner, P., Sauter, A., Fiedler, W. & Jenni, L. Variable Allocation of Activity to  
724 Daylight and Night in the Mallard. *Animal Behaviour* **115**, 69–79. ISSN: 0003-3472  
725 (May 2016).
- 726 84. Ross, J., Bridge, E., Rozmarynowycz, M. & Bingman, V. *Data from: Individual*  
727 *Variation in Migratory Path and Behavior among Eastern Lark Sparrows* 2014.
- 728 85. Lamb, J. S., Satgé, Y. G. & Jodice, P. G. R. Influence of Density-Dependent Com-  
729 petition on Foraging and Migratory Behavior of a Subtropical Colonial Seabird.  
730 *Ecology and Evolution* **7**, 6469–6481. ISSN: 2045-7758 (2017).

- 731 86. Lyons, D. E., Patterson, A. G. L., Tennyson, J., Lawes, T. J. & Roby, D. D. The  
732 Salton Sea: Critical Migratory Stopover Habitat for Caspian Terns (*Hydroprogne*  
733 *Caspia*) in the North American Pacific Flyway. *Waterbirds* **41**, 154–165. ISSN:  
734 1524-4695, 1938-5390 (June 2018).
- 735 87. Nagy, M., Couzin, I. D., Fiedler, W., Wikelski, M. & Flack, A. Synchronization,  
736 Coordination and Collective Sensing during Thermalling Flight of Freely Migrat-  
737 ing White Storks. *Philosophical Transactions of the Royal Society B: Biological*  
738 *Sciences* **373**, 20170011 (May 2018).
- 739 88. Petersen, M. R., Earned, W. W. & Douglas, D. C. At-Sea Distribution of Spectacled  
740 Eiders: A 120-Year-Old Mystery Resolved. *The Auk* **116**, 1009–1020. ISSN: 1938-  
741 4254 (Oct. 1999).
- 742 89. Petersen, M. R., Grand, J. B. & Dau, C. P. Spectacled Eider (*Somateria Fischeri*),  
743 Version 2.0. *Birds of North America* (2000).
- 744 90. Petersen, M., Flint, P. L., Mulcahy, D. & Douglas, D. C. *Tracking Data for Common*  
745 *Eiders (Somateria Mollissima)* 2021.
- 746 91. Petersen, M. R., Douglas, D. C. & Mulcahy, D. M. Use of Implanted Satellite  
747 Transmitters to Locate Spectacled Eiders At-Sea. *The Condor* **97**, 276–278. ISSN:  
748 0010-5422 (1995).
- 749 92. Petersen, M. R. & Douglas, D. C. Winter Ecology of Spectacled Eiders: Envi-  
750 ronmental Characteristics and Population Change. *The Condor* **106**, 79–94. ISSN:  
751 0010-5422 (2004).
- 752 93. Poli, C. L., Harrison, A.-L., Vallarino, A., Gerard, P. D. & Jodice, P. G. R. Dynamic  
753 Oceanography Determines Fine Scale Foraging Behavior of Masked Boobies in the  
754 Gulf of Mexico. *PLOS ONE* **12**, e0178318. ISSN: 1932-6203 (June 2017).
- 755 94. Ross, J. D., Bridge, E. S., Rozmarynowycz, M. J. & Bingman, V. P. Individual  
756 Variation in Migratory Path and Behavior among Eastern Lark Sparrows. *Animal*  
757 *Migration* **2**, 29–33. ISSN: 2084-8838 (Jan. 2015).
- 758 95. Fleishman, E. *et al.* *Data from: Space Use by Swainson's Hawk (Buteo Swainsoni)*  
759 *in the Natomas Basin, California*
- 760 96. Senner, N. R. *et al.* When Siberia Came to the Netherlands: The Response of  
761 Continental Black-Tailed Godwits to a Rare Spring Weather Event. *Journal of*  
762 *Animal Ecology* **84**, 1164–1176. ISSN: 1365-2656 (2015).

- 763 97. Sexson, M. G., Petersen, M. R., Breed, G. A. & Powell, A. N. Shifts in the Dis-  
764 tribution of Molting Spectacled Eiders (*Somateria Fischeri*) Indicate Ecosystem  
765 Change in the Arctic. *The Condor* **118**, 463–476. ISSN: 1938-5129 (Aug. 2016).
- 766 98. Shariati-Najafabadi, M. *et al.* Environmental Parameters Linked to the Last Migra-  
767 tory Stage of Barnacle Geese En Route to Their Breeding Sites. *Animal Behaviour*  
768 **118**, 81–95. ISSN: 0003-3472 (Aug. 2016).
- 769 99. Shariatinajafabadi, M. *et al.* Migratory Herbivorous Waterfowl Track Satellite-  
770 Derived Green Wave Index. *PLOS ONE* **9**, e108331. ISSN: 1932-6203 (Sept. 2014).
- 771 100. Shariati Najafabadi, M. *et al.* Satellite- versus Temperature-Derived Green Wave  
772 Indices for Predicting the Timing of Spring Migration of Avian Herbivores. *Eco-*  
773 *logical Indicators* **58**, 322–331. ISSN: 1470-160X (Nov. 2015).
- 774 101. Silveira, N. S. D., Niebuhr, B. B. S., Muylaert, R. d. L., Ribeiro, M. C. & Pizo, M. A.  
775 Effects of Land Cover on the Movement of Frugivorous Birds in a Heterogeneous  
776 Landscape. *PLOS ONE* **11**, e0156688. ISSN: 1932-6203 (June 2016).
- 777 102. Soanes, L. M., Atkinson, P. W., Gauvain, R. D. & Green, J. A. Individual Consis-  
778 tency in the Foraging Behaviour of Northern Gannets: Implications for Interactions  
779 with Offshore Renewable Energy Developments. *Marine Policy* **38**, 507–514. ISSN:  
780 0308-597X (Mar. 2013).
- 781 103. Spiegel, O., Getz, W. M. & Nathan, R. Factors Influencing Foraging Search Ef-  
782 ficiency: Why Do Scarce Lappet-Faced Vultures Outperform Ubiquitous White-  
783 Backed Vultures? *The American Naturalist* **181**, E102–E115. ISSN: 0003-0147 (May  
784 2013).
- 785 104. Tarrow, A. *et al.* Flexible Flight Response to Challenging Wind Conditions in a  
786 Commuting Antarctic Seabird: Do You Catch the Drift? *Animal Behaviour* **113**,  
787 99–112. ISSN: 0003-3472 (Mar. 2016).
- 788 105. Van Toor, M. L. *et al.* Flexibility of Continental Navigation and Migration in  
789 European Mallards. *PLOS ONE* **8**, e72629. ISSN: 1932-6203 (Aug. 2013).
- 790 106. Flack, A. *et al.* *Data from: Costs of Migratory Decisions: A Comparison across*  
791 *Eight White Stork Populations* 2015.
- 792 107. Torres, L. G., Orben, R. A., Tolkova, I. & Thompson, D. R. Classification of An-  
793 imal Movement Behavior through Residence in Space and Time. *PLOS ONE* **12**,  
794 e0168513. ISSN: 1932-6203 (Jan. 2017).



- 795 108. Tucker, M. A. *et al.* Large Birds Travel Farther in Homogeneous Environments.  
796 *Global Ecology and Biogeography* **28** (ed Boucher-Lalonde, V.) 576–587. ISSN: 1466-  
797 822X, 1466-8238 (May 2019).
- 798 109. van Toor, M. L., Avril, A., Wu, G., Holan, S. H. & Waldenström, J. As the Duck  
799 Flies—Estimating the Dispersal of Low-Pathogenic Avian Influenza Viruses by  
800 Migrating Mallards. *Frontiers in Ecology and Evolution* **6**. ISSN: 2296-701X (2018).
- 801 110. Warwick-Evans, V. *et al.* Changes in Behaviour Drive Inter-Annual Variability  
802 in the at-Sea Distribution of Northern Gannets. *Marine Biology* **163**, 156. ISSN:  
803 1432-1793 (June 2016).
- 804 111. Warwick-Evans, V., Atkinson, P. W., Walkington, I. & Green, J. A. Predicting  
805 the Impacts of Wind Farms on Seabirds: An Individual-Based Model. *Journal of*  
806 *Applied Ecology* **55**, 503–515. ISSN: 1365-2664 (2018).
- 807 112. Weinzierl, R. *et al.* Wind Estimation Based on Thermal Soaring of Birds. *Ecology*  
808 *and Evolution* **6**, 8706–8718. ISSN: 2045-7758 (2016).
- 809 113. Wikelski, M. *et al.* True Navigation in Migrating Gulls Requires Intact Olfactory  
810 Nerves. *Scientific Reports* **5**, 17061. ISSN: 2045-2322 (Nov. 2015).
- 811 114. Ens, B. *et al.* SOVON-onderzoeksrapport 2008/10: *Tracking of individual birds.*  
812 *Report on WP 3230 (bird tracking sensor characterization) and WP 4130 (sensor*  
813 *adaptation and calibration for bird tracking system) of the FlySafe basic activi-*  
814 *ties project.* English. Reporting year: 2008 (SOVON Vogelonderzoek Nederland,  
815 Netherlands, 2008).
- 816 115. DeLuca, W. *et al.* *Data from: Transoceanic migration by a 12 g songbird* 2015.  
817 <http://dx.doi.org/10.5441/001/1.jb182ng4>.
- 818 116. Georgopoulou, E., Alexandrou, O., Manolopoulos, A., Xirouchakis, S. & Catsado-  
819 rakis, G. Home Range of the Dalmatian Pelican in South-East Europe. *European*  
820 *Journal of Wildlife Research* **69**, 41. ISSN: 1439-0574. [https://doi.org/10.1007/](https://doi.org/10.1007/s10344-023-01667-1)  
821 [s10344-023-01667-1](https://doi.org/10.1007/s10344-023-01667-1) (2023) (Mar. 31, 2023).
- 822 117. Lamb, J., Satgé, Y. & Jodice, P. *Data from: Influence of Density-Dependent Com-*  
823 *petition on Foraging and Migratory Behavior of a Subtropical Colonial Seabird*  
824 *2017.*
- 825 118. Scott, T. Movements of White-Headed and White-Backed Vultures. *Boise State*  
826 *University Theses and Dissertations.* [https://scholarworks.boisestate.edu/](https://scholarworks.boisestate.edu/td/1716)  
827 [td/1716](https://scholarworks.boisestate.edu/td/1716) (Aug. 1, 2020).

- 828 119. Matthes, D. *et al.* *Data from: Flexibility of Continental Navigation and Migration*  
829 *in European Mallards* 2013.
- 830 120. Zhang, G. *et al.* Bidirectional Movement of Emerging H5N8 Avian Influenza Viruses  
831 Between Europe and Asia via Migratory Birds Since Early 2020. *Molecular Biol-*  
832 *ogy and Evolution* **40**, msad019. ISSN: 1537-1719. [https://doi.org/10.1093/](https://doi.org/10.1093/molbev/msad019)  
833 [molbev/msad019](https://doi.org/10.1093/molbev/msad019) (2023) (Feb. 1, 2023).
- 834 121. Chen, T. & Guestrin, C. *XGBoost: A Scalable Tree Boosting System* in *Proceedings*  
835 *of the 22nd ACM SIGKDD International Conference on Knowledge Discovery and*  
836 *Data Mining* (Association for Computing Machinery, New York, NY, USA, Aug.  
837 2016), 785–794. ISBN: 978-1-4503-4232-2. [https://doi.org/10.1145/2939672.](https://doi.org/10.1145/2939672.2939785)  
838 [2939785](https://doi.org/10.1145/2939672.2939785) (2020).
- 839 122. Van Doren, B. M. & Horton, K. G. A continental system for forecasting bird  
840 migration. *Science* **361**, 1115–1118. ISSN: 0036-8075. [http://www.sciencemag.](http://www.sciencemag.org/lookup/doi/10.1126/science.aat7526)  
841 [org/lookup/doi/10.1126/science.aat7526](http://www.sciencemag.org/lookup/doi/10.1126/science.aat7526) (Sept. 2018).
- 842 123. Shu, Y. & McCauley, J. GISAID: Global initiative on sharing all influenza data –  
843 from vision to reality. en. *Eurosurveillance* **22**. Publisher: European Centre for Dis-  
844 ease Prevention and Control, 30494. ISSN: 1560-7917. [https://www.eurosurveillance.](https://www.eurosurveillance.org/content/10.2807/1560-7917.ES.2017.22.13.30494?crawler=true)  
845 [org/content/10.2807/1560-7917.ES.2017.22.13.30494?crawler=true](https://www.eurosurveillance.org/content/10.2807/1560-7917.ES.2017.22.13.30494?crawler=true) (2022)  
846 (Mar. 2017).
- 847 124. Khare, S. *et al.* GISAID’s Role in Pandemic Response. *China CDC Weekly* **3**,  
848 1049–1051. ISSN: 2096-7071 (Dec. 2021).
- 849 125. Elbe, S. & Buckland-Merrett, G. Data, Disease and Diplomacy: GISAID’s Innova-  
850 tive Contribution to Global Health. *Global Challenges* **1**, 33–46. ISSN: 2056-6646  
851 (2017).
- 852 126. Price, M., Dehal, P. & Arkin, A. FastTree: computing large minimum evolution  
853 trees with profiles instead of a distance matrix. en. *Mol Biol Evol* **26**, 1641–1650  
854 (2009).
- 855 127. Lam, T.-Y. The genesis and source of the H7N9 influenza viruses causing human  
856 infections in China. en. *Nature* **502**, 241 (2013).
- 857 128. Rambaut, A., Lam, T., Carvalho, L. & Pybus, O. Exploring the temporal structure  
858 of heterochronous sequences using TempEst (formerly Path-O-Gen. en. *Virus Evol*  
859 **2**, vew007 (2016).
- 860 129. Suchard, M. Bayesian phylogenetic and phylodynamic data integration using BEAST  
861 1.10. en. *Virus Evolution* **4** (2018).

- 862 130. Ayres, D. BEAGLE: an application programming interface and high-performance  
863 computing library for statistical phylogenetics. en. *Syst Biol* **sy100** (2011).
- 864 131. Drummond, A., Ho, S., Phillips, M. & Rambaut, A. Relaxed phylogenetics and  
865 dating with confidence. en. *PLoS Biol* **4**, 88 (2006).
- 866 132. Shapiro, B., Rambaut, A. & Drummond, A. Choosing Appropriate Substitution  
867 Models for the Phylogenetic Analysis of Protein-Coding Sequences. en. *Mol Biol*  
868 *Evol* **23**, 7–9 (2005).
- 869 133. Minin, V., Bloomquist, E. & Suchard, M. Smooth skyride through a rough skyline:  
870 Bayesian coalescent-based inference of population dynamics. en. *Mol Biol Evol* **25**,  
871 1459–1471 (2008).
- 872 134. Rambaut, A., Drummond, A., Xie, D., Baele, G. & Suchard, M. Posterior Sum-  
873 marization in Bayesian Phylogenetics Using Tracer 1.7. cs. *Systematic Biology* **67**,  
874 901–904 (2018).
- 875 135. O’Brien, J. D., Minin, V. N. & Suchard, M. A. Learning to Count: Robust Esti-  
876 mates for Labeled Distances between Molecular Sequences. *Molecular Biology and*  
877 *Evolution* **26**, 801–814. ISSN: 0737-4038. [https://doi.org/10.1093/molbev/](https://doi.org/10.1093/molbev/msp003)  
878 [msp003](https://doi.org/10.1093/molbev/msp003) (2021) (Apr. 2009).
- 879 136. Minin, V. N. & Suchard, M. A. Fast, accurate and simulation-free stochastic map-  
880 ping. *Philosophical Transactions of the Royal Society B: Biological Sciences* **363**.  
881 Publisher: Royal Society, 3985–3995. [https://royalsocietypublishing.org/](https://royalsocietypublishing.org/doi/10.1098/rstb.2008.0176)  
882 [doi/10.1098/rstb.2008.0176](https://royalsocietypublishing.org/doi/10.1098/rstb.2008.0176) (2021) (Dec. 2008).
- 883 137. Faria, N. R., Suchard, M. A., Rambaut, A., Streicker, D. G. & Lemey, P. Simulta-  
884 neously reconstructing viral crossspecies transmission history and identifying the  
885 underlying constraints. *Philosophical Transactions of the Royal Society B: Biolog-*  
886 *ical Sciences* **368**. ISSN: 14712970 (2013).
- 887 138. Faria, N. R. *et al.* Distinct rates and patterns of spread of the major HIV-1 sub-  
888 types in Central and East Africa. *PLoS Pathogens* **15**. Publisher: Public Library  
889 of Science, e1007976. ISSN: 15537374 (2019).
- 890 139. Faria, N. R. *et al.* The early spread and epidemic ignition of HIV-1 in human  
891 populations. *Science* **346**, 56–61. ISSN: 10959203 (2014).
- 892 140. Vasylyeva, T. I. *et al.* Molecular epidemiology reveals the role of war in the spread  
893 of HIV in Ukraine. *Proceedings of the National Academy of Sciences of the United*  
894 *States of America* **115**, 1051–1056. ISSN: 10916490 (2018).

- 895 141. Thézé, J. *et al.* Genomic Epidemiology Reconstructs the Introduction and Spread  
896 of Zika Virus in Central America and Mexico. *Cell Host and Microbe* **23**, 855–  
897 864.e7. ISSN: 19346069 (2018).
- 898 142. Yang, Q. *et al.* Assessing the role of live poultry trade in community-structured  
899 transmission of avian influenza in China. en. *Proceedings of the National Academy*  
900 *of Sciences* **117**, 5949–5954. ISSN: 0027-8424, 1091-6490. [http://www.pnas.org/](http://www.pnas.org/lookup/doi/10.1073/pnas.1906954117)  
901 [lookup/doi/10.1073/pnas.1906954117](http://www.pnas.org/lookup/doi/10.1073/pnas.1906954117) (2021) (Mar. 2020).

902 **6 Figures**

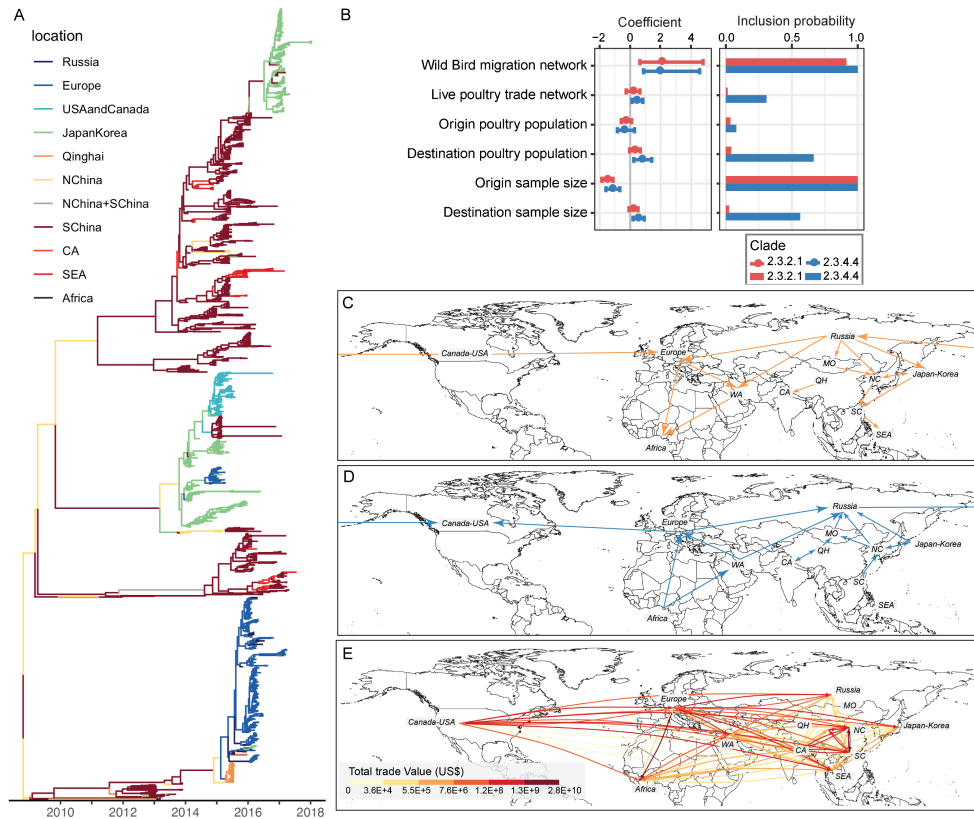

Figure 1: (A) Maximum clade credibility (MCC) time-scaled phylogeny of clade 2.3.4.4 with branches annotated with the inferred location. (B) Contributions of predictors to worldwide diffusion of H5N1 clade 2.3.2.1 and clade 2.3.4.4 inferred from HA genes by GLM-extended Bayesian phylogeographic inference with heterogeneous evolutionary processes through time. Predictors in the model included bird migration network during (C) Northern Hemisphere fall season and (D) Northern Hemisphere spring season, where directed non-weighted edges represent the occurrence of bird migration based on empirical data, and (E) live poultry trade network, where directed weighted edges represent poultry trade value. NChina/NC: North China; SChina/SC: South China; SEA: South-East Asia; CA: Central Asia; QH: Qinghai; MO: Mongolia; WA: Western Asia.

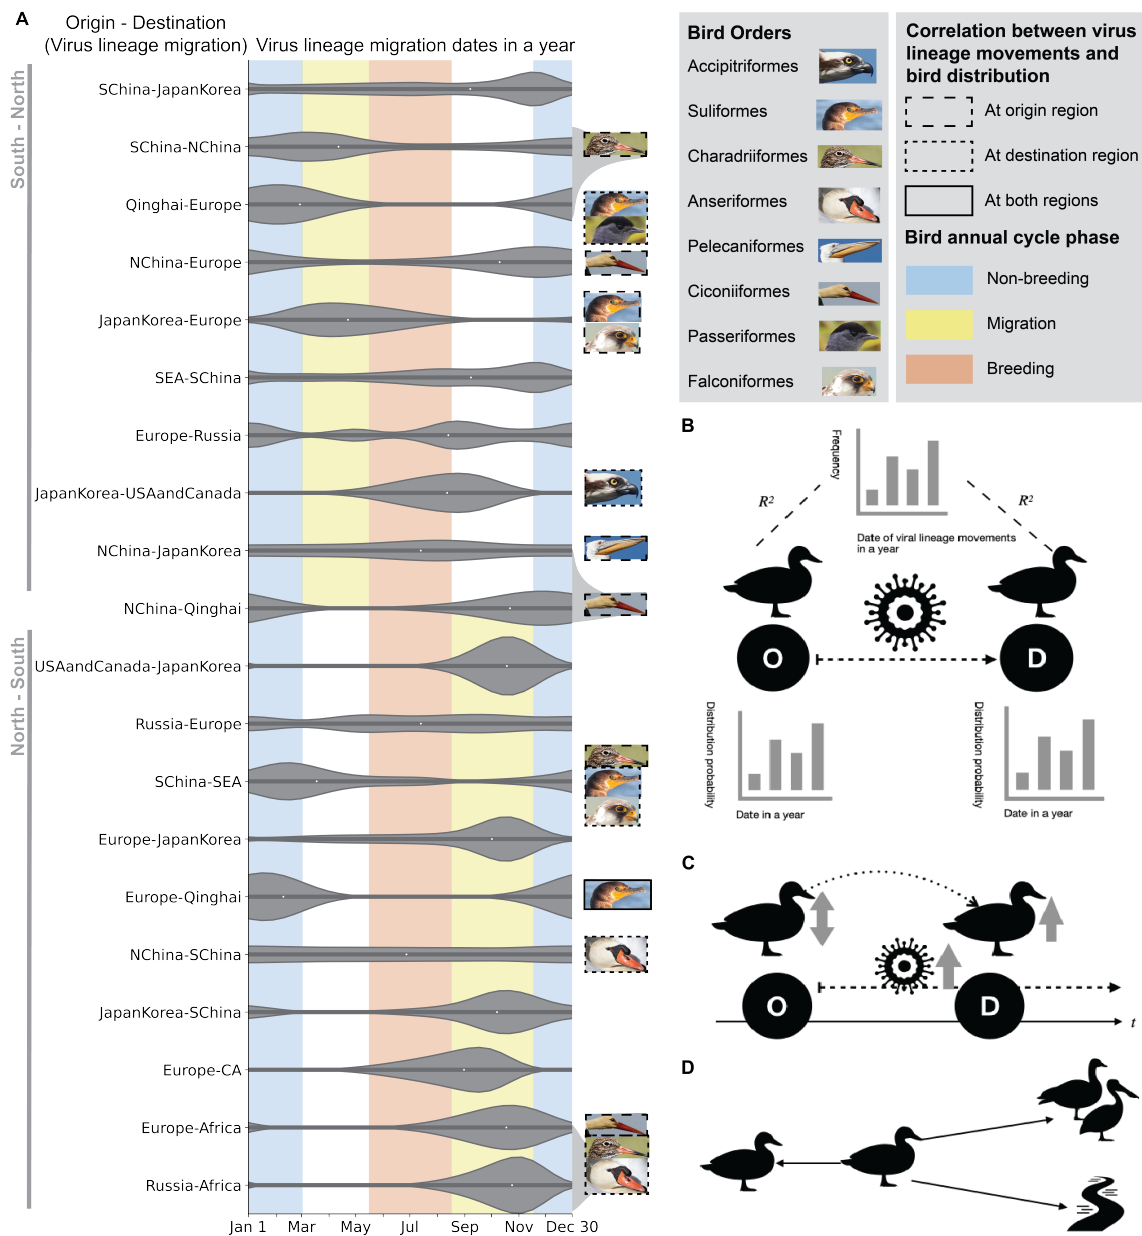

Figure 2: (A) Probability density distribution of the virus lineage migration throughout the year, between locations summarized from the discrete trait phylogeography of HPAIV H5 clade 2.3.4.4 and the Markov jump counts (Section 4.3). X axis: Virus lineage migration dates in a year; labels on Y axis: origin region - destination region of the virus lineage migration. The width of the violins represents the virus lineage migration probability density. Boxes around bird photos show the statistically significant correlation of virus lineage movements and bird order distribution at origin, destination or both regions. Bird species photos were obtained from the Macaulay Library at the Cornell Lab of Ornithology ([macaulaylibrary.org](http://macaulaylibrary.org)). The entries of the photos are listed in Table S5. Non-breeding (blue), migration (yellow) and breeding (red) bird annual cycle phases in general are shown in the south-north migration direction and in the north-south migration direction. (B) Schematic diagram of cross-correlation analyses of virus lineage movement between two locations (O: origin, D: destination) and the bird distribution probability at each location. (C) Time scale of virus lineage movement, bird migration and local virus transmission, including inter-species, inter-individual and environmental transmissions. The grey arrows indicate the increase or decrease of the local bird population and the virus lineage movement influx. (D) Local transmission of AIV includes inter-individual transmission within a population, inter-species transmission within a bird community and potential environmental transmission.

## 903 **7 Data Availability Statement**

904 We provide Movebank Study ID (unique searchable identifier) and relevant metadata  
905 information for Movebank bird tracking data. We also provide accession ID for GI-  
906 SAID virus genomic data. All code scripts for analyzing data are provided. All data  
907 and scripts are available as a public project <https://doi.org/10.17605/OSF.IO/7A2UK>  
908 on Open Science Framework and GitHub Repository <https://github.com/kikiyang/>  
909 HPAI\_Bird\_world.
